# Supplementary material for: External validation of cut-off points for foveal thickness taking into account the intraretinal fluid using optical coherence tomography to diagnose diabetic macular oedema
Source: PeerJ. 2017 Oct 12;5:e3922. doi: 10.7717/peerj.3922 (PMC5641426; doi:10.7717/peerj.3922)
Supplement: Data S1 [file peerj-05-3922-s001.xlsx]

## Sheet: Raw data
Outcome	Foveal thickness	Intraretinal fluid
0	272	0
0	264	0
0	223	0
0	225	0
0	262	0
1	331	1
1	270	1
1	350	1
1	377	1
0	267	0
0	266	0
1	336	1
1	327	1
0	227	0
0	222	0
1	331	1
1	333	1
0	186	0
0	186	0
0	240	0
0	241	0
0	251	0
0	215	0
0	224	0
0	313	1
0	355	1
0	245	0
0	250	0
0	220	0
0	221	0
1	291	1
1	183	0
1	231	0
1	239	0
0	244	0
0	235	0
0	191	0
0	197	0
0	272	0
0	272	0
0	250	0
0	242	0
1	258	0
1	317	1
1	364	1
0	269	0
0	254	0
0	245	0
0	245	0
0	200	0
0	205	0
0	155	0
0	223	0
0	250	0
0	243	0
0	244	0
0	250	0
0	217	0
0	205	0
0	204	0
0	246	0
0	254	0
1	300	1
1	295	0
0	196	0
0	191	0
1	578	1
1	590	1
0	272	1
0	289	1
0	237	0
0	235	0
1	512	1
1	523	1
1	278	1
0	204	0
0	210	0
1	239	0
1	233	0
0	267	0
1	442	1
1	399	1
1	375	1
0	257	0
0	277	0
1	253	0
0	254	0
0	282	0
0	246	0
0	253	0
0	190	0
0	202	0
1	266	1
1	342	1
1	220	0
1	254	0
0	218	0
0	220	0
0	207	0
0	222	0
1	470	1
0	232	0
0	237	0
0	225	0
0	238	0
0	249	0
0	250	0
1	224	1
0	240	0
0	216	0
0	223	0
0	210	0
0	211	0
0	247	0
0	248	0
0	265	0
0	259	0
0	223	0
0	229	0
0	206	0
0	222	0
1	358	1
1	331	1
0	222	0
0	228	0
0	214	0
0	195	0
1	305	1
1	461	1
0	287	1
0	261	0
1	282	1
1	580	1
1	396	1
